# Supplementary material for: TRPM5 mediates acidic extracellular pH signaling and TRPM5 inhibition reduces spontaneous metastasis in mouse B16-BL6 melanoma cells
Source: PubMed Central journal article supplement (PMC5667964; doi:10.18632/oncotarget.20826), 2017-09-11
Supplement: oncotarget-08-78312-s001.pdf [file oncotarget-08-78312-s001.pdf]

## TRPM5 mediates acidic extracellular pH signaling and TRPM5 inhibition reduces spontaneous metastasis in mouse B16-BL6 melanoma cells

### SUPPLEMENTARY MATERIALS

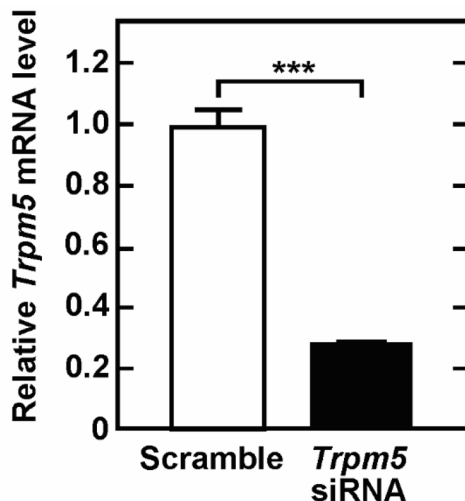

**Supplementary Figure 1: Reduction of *Trpm5* mRNA by transfection of *Trpm5* siRNA.** After transfection of *Trpm5* siRNA, total RNA was extracted, reverse-transcribed, and quantified by qPCR. Data were calculated relative to scramble control and represented as mean  $\pm$  SE in triplicate assay. \*\*\* $P < 0.001$ .

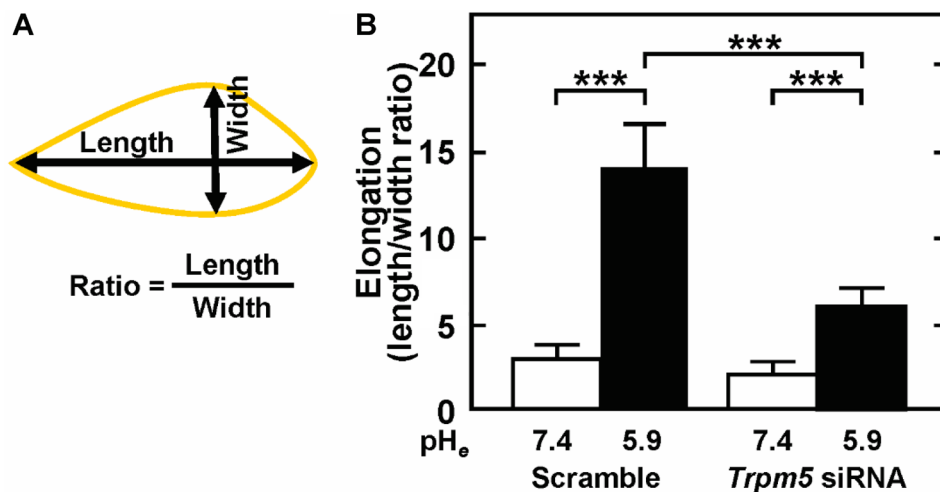

**Supplementary Figure 2: Introduction of *Trpm5* siRNA reduces acidic pH<sub>e</sub>-altered morphology to fibroblastic.** Inhibition of acidic pH<sub>e</sub>-induced elongation by transfection of *Trpm5* siRNA. Following transfection, the cells were incubated in serum-free medium at neutral and acidic pH. Cell elongation was determined as length/width ratio (A) and represented as mean  $\pm$  SE in quadruplicate assay of more than 50 cells (B). \*\*\* $P < 0.001$ .

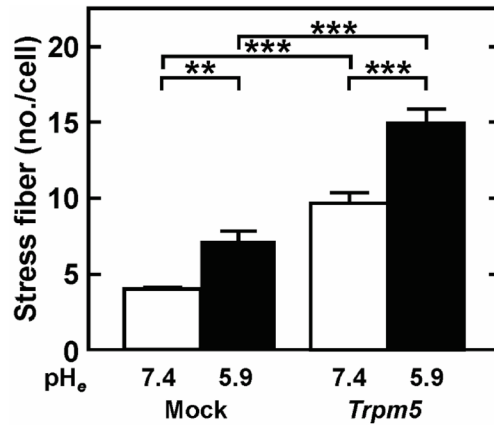

**Supplementary Figure 3: Constitutive expression of *Trpm5* mRNA increases the induction of actin reorganization by acidic pH<sub>e</sub>.** After rhodamine-phalloidin staining, numbers of well-organized stress fibers in *Trpm5* (#16) and Mock (#9) transfectants were counted and expressed as the counts per cell in quintuplicate assay of more than 35 cells. \*\**P* < 0.01, \*\*\**P* < 0.001.

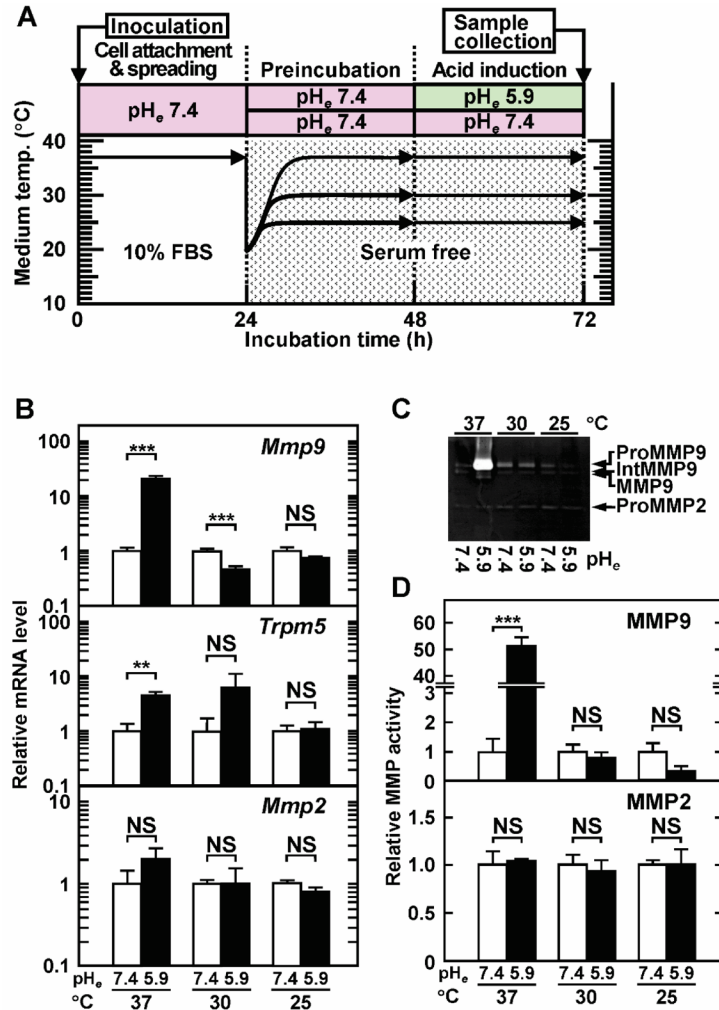

**Supplementary Figure 4: Thermal inactivation of channel activity of TRPM5 reduced acidic pH<sub>e</sub> induction of MMP-9 production.** (A) Time line illustrating course of treatment of BL6 cells: pH<sub>e</sub> and temperature of media. (B) RT-qPCR for *Mmp9*, *Mmp2* and *Trpm5* mRNA. (C) Zymographic analysis for MMP-9 and -2. (D) Densitometric analysis of zymography for MMP-9 and -2 in triplicate assay including (C) as the representative. All data were expressed as relative to pH<sub>e</sub> 7.4 at each temperature. \*\**P* < 0.01, \*\*\**P* < 0.001. NS, not significant.
